# Supplementary material for: Application of a Physiologically Based Pharmacokinetic Model to Develop a Veterinary Amorphous Enrofloxacin Solid Dispersion
Source: MDPI journal article supplement (doi:10.3390/pharmaceutics13050602), 2021-04-22
Supplement: s1 [file s1]

# Supplementary Materials: Application of a Physiologically Based Pharmacokinetic Model to Develop a Veterinary Amorphous Enrofloxacin Solid Dispersion

Kaixiang Zhou, Meixia Huo, Wenjin Ma, Kun Mi, Xiangyue Xu, Samah Attia Algharib, Shuyu Xie and Lingli Huang

**Table S1. Physiological parameters used in the PBPK model for enrofloxacin in swine.**

| Parameter                        | Abbreviation | Model value | Published value              |
|----------------------------------|--------------|-------------|------------------------------|
| Body weight (kg)                 | BW           | 20.0        | 92.5 ± 4.0 <sup>c</sup>      |
| Cardiac output (L/h/kg)          | QCC          | 5.0         | 8.70 ± 1.62 <sup>c</sup>     |
| <b>Tissue volume<sup>a</sup></b> |              |             |                              |
| Small intestine                  | VSIC         | 0.036       | 0.0126 ± 0.0023 <sup>c</sup> |
| Arterial blood                   | VartC        | 0.0156      | 0.0156 <sup>d</sup>          |
| Venous blood                     | VvenC        | 0.0444      | 0.0444 <sup>d</sup>          |
| Liver                            | VLC          | 0.0247      | 0.0201 ± 0.0025 <sup>c</sup> |
| Kidney                           | VKC          | 0.004       | 0.0037 ± 0.001 <sup>c</sup>  |
| Muscle                           | VMC          | 0.4         | 0.426 ± 0.039 <sup>c</sup>   |
| Fat                              | VFC          | 0.32        | 0.32 <sup>d</sup>            |
| Lung                             | VLuC         | 0.01        | 0.0077 ± 0.0014 <sup>c</sup> |
| Rest of body                     | VrestC       | 0.1813      | 0.1813 <sup>d</sup>          |
| <b>Blood flow<sup>b</sup></b>    |              |             |                              |
| Liver                            | QLC          | 0.2725      | 0.243 ± 0.075 <sup>c</sup>   |
| Kidney                           | QKC          | 0.12        | 0.114 ± 3.2 <sup>c</sup>     |
| Muscle                           | QMC          | 0.251       | 0.342 ± 0.346 <sup>c</sup>   |
| Fat                              | QFC          | 0.1275      | 0.1275 <sup>d</sup>          |
| Rest of body                     | QrestC       | 0.229       | 0.229 <sup>d</sup>           |

**Note:** <sup>a</sup>fraction of body weight, unitless; <sup>b</sup>fraction of cardiac output, unitless. <sup>c</sup>Lin et al, 2020 (the experimental measured data); <sup>d</sup>Lin et al, 2016.

**Table S2. Chemical-specific parameters used in the PBPK model for enrofloxacin in swine.**

| Parameter                                              | Abbreviation | Model value | Published value <sup>a</sup> |
|--------------------------------------------------------|--------------|-------------|------------------------------|
| <b>Absorption rate constant (/h)</b>                   |              |             |                              |
| Gastric emptying                                       | Kst          | 2.0         | 1.0                          |
| Intestinal absorption                                  | Ka           | 0.55        | 0.55                         |
| Intramuscular                                          | Kim          | 0.0         | 0.5                          |
| Subcutaneous                                           | Ksc          | 0.0         | 0.1                          |
| <b>Tissue: plasma partition coefficient (unitless)</b> |              |             |                              |
| Liver                                                  | PL           | 4.3         | 4.3                          |
| Kidney                                                 | PK           | 5.5         | 5.5                          |
| Muscle                                                 | PM           | 3.0         | 3.0                          |
| Fat                                                    | PF           | 0.53        | 0.53                         |
| Lung                                                   | Plu          | 4.3         | 4.3                          |
| Hepatic metabolic rate [(/h*kg)]                       | KmC          | 0.045       | 0.045                        |
| Plasma protein binding rate                            | PB           | 0.46        | 0.46                         |
| Fecal elimination rate constant (/h)                   | Kfeces       | 0.01        | 0.01                         |
| Urinary elimination rate constant (L/h/kg)             | KurineC      | 0.12        | 0.12                         |

**Note:** <sup>a</sup>Lin et al, 2016.

## Enrofloxacin PBPK model code in AcslX format

### PROGRAM

#### INITIAL

! code that is executed once at the beginning of a simulation run goes here

#### !! Physiological parameters

! Blood flow rates (fraction of cardiac output)

CONSTANT QCC = 5 ! Cardiac output index (L/h/kg), also blood flow of lung, from Upton (2008)

CONSTANT QLC = 0.2725 ! liver, average from Buur et al. (2005) and Upton (2008)

CONSTANT QKC = 0.12 ! kidney, average from Buur et al. (2005) and Upton (2008)

CONSTANT QMC = 0.251 ! Muscle, average from Buur et al. (2005) and Upton (2008)

CONSTANT QFC = 0.1275 ! Fat, average from Buur et al. (2005) and Upton (2008)

#### ! Tissue volumes (fraction of body weight)

CONSTANT BW = 55 ! Kg, body weight was study-specific; The actual value in present study

CONSTANT VLC = 0.0247 ! liver, average from Buur et al. (2005) and Upton (2008)

CONSTANT VKC = 0.004 ! Kidneys, average from Buur et al. (2005) and Upton (2008)

CONSTANT VMC = 0.40 ! Muscle, average from Buur et al. (2005) and Upton (2008)

CONSTANT VFC = 0.32 ! Fat, adipose tissue, average from Buur et al. (2005) and Upton (2008)

CONSTANT VLuC = 0.01 ! Lungs, average from Buur et al. (2005) and Upton (2008)

CONSTANT VBloodC = 0.06 ! Blood, average from Buur et al. (2005) and Upton (2008)

CONSTANT VSIC = 0.036 ! Small intestine, from Lautz et al. (2020).

#### !! Mass transfer parameters (Chemical-specific parameters)

! Chemical molecular weights and unit conversion factors, from PubChem

CONSTANT MW = 359.4 ! g/mol, enrofloxacin

CONSTANT MWmol = 2.78 !  $\mu\text{mol}/\text{mg}$ , enrofloxacin, from mg to  $\mu\text{mol}$

CONSTANT MWmg = 0.36 !  $\text{mg}/\mu\text{mol}$ , enrofloxacin, from  $\mu\text{mol}$  to mg

#### ! Kinetic constants

! Oral absorption and fecal elimination rate constants for enrofloxacin

CONSTANT Kst = 2 ! /h, gastric emptying rate constant

CONSTANT Ka = 0.55 ! /h, intestinal absorption rate constant

CONSTANT Kfeces = 0.01 ! /h, intestinal transit rate constant (fecal elimination rate constant)

! IV infusion/injection rate constants

CONSTANT Timeiv = 0.01 ! h, IV infusion/injection time

! IM absorption rate constants (set parameter value equal to 0.0 when not used in a particular simulation)

CONSTANT Kim = 0.0 ! /h, intramuscular absorption rate constant

! SC absorption rate constants

CONSTANT Ksc = 0.0 ! /h, subcutaneous absorption rate constant

! Partition coefficients for enrofloxacin (PC, unitless)

! The values from Buur et al. 2005 were used as initial values for further estimation.

CONSTANT PL = 4.3 ! Liver:plasma PC

CONSTANT PK = 5.5 ! Kidney:plasma PC

CONSTANT PM = 3 ! Muscle:plasma PC

CONSTANT PF = 0.53 ! Fat:plasma PC

CONSTANT PLu = 4.3 ! Lung:plasma PC

CONSTANT Prest = 8 ! Rest-of-body:plasma PC

! Partition coefficients for the ciprofloxacin (usually designated as the marker residue) (PC, unitless)

CONSTANT PL1 = 4.3 ! Liver:plasma PC

CONSTANT PK1 = 5.5 ! Kidney:plasma PC

CONSTANT PM1 = 4.3 ! Muscle:plasma PC

CONSTANT PF1 = 0.53 ! Fat:plasma PC

CONSTANT PLu1 = 4.3 ! Lung:plasma PC

CONSTANT Prest1 = 8 ! Rest-of-body:plasma PC

! Percentage plasma protein binding (unitless), Buur et al. (2005)

CONSTANT PB = 0.46 ! Percentage of enrofloxacin bound to plasma proteins

! Metabolic rate constants

CONSTANT KmC = 0.045 ! /(h\*kg), liver metabolic rate constant of the enrofloxacin

! Urinary elimination rate constants

CONSTANT KurineC = 0.12 ! L/h/kg, for enrofloxacin

CONSTANT PDOSEoral = 5 ! mg/kg

CONSTANT PDOSEiv = 0 ! mg/kg

CONSTANT PDOSEim = 0 ! mg/kg

CONSTANT PDOSEsc = 0 ! mg/kg

END ! INITIAL

DYNAMIC

ALGORITHM IALG = 2

NSTEPS NSTP = 10

MAXTERVAL MAXT = 1.0e9

MINTERVAL MINT = 1.0e-9

CINTERVAL CINT = 0.1

DERIVATIVE

! code for calculating the derivative goes here

! Cardiac output and blood flows to tissues (L/h)

QC=QCC\*BW ! Cardiac output

QL=QLC\*QC ! Blood flow to the liver

QK=QKC\*QC ! Blood flow to the kidney

QM=QMC\*QC ! Blood flow to the muscle

QF=QFC\*QC ! Blood flow to the fat

Qrest = QC-QL-QK-QM-QF ! Blood flow to the rest of body

! Tissue volumes (L)

$VL = VLC * BW$  ! Liver

$VK = VKC * BW$  ! Kidney

$VM = VMC * BW$  ! Muscle

$VF = VFC * BW$  ! Fat

$VLu = VLuC * BW$  ! Lung

$VBlood = VBloodC * BW$  ! Blood

$V_{ven} = VBlood * 0.74$  ! Venous blood

$V_{art} = VBlood * 0.26$  ! Arterial blood

$V_{rest} = BW - VL - VK - VM - VF - VLu - VBlood$  ! Rest of body

$V_{Si} = V_{SiC} * BW$  ! Small intestine

! Dosing amounts (mg converted to  $\mu\text{mol}$ )

$DOSE_{oral} = PDSE_{oral} * BW * MW_{mol}$  !  $\mu\text{mol}$

$DOSE_{iv} = PDSE_{iv} * BW * MW_{mol}$  !  $\mu\text{mol}$

$DOSE_{im} = PDSE_{im} * BW * MW_{mol}$  !  $\mu\text{mol}$

$DOSE_{sc} = PDSE_{sc} * BW * MW_{mol}$  !  $\mu\text{mol}$

! Multiple oral dosing using the PULSE/EXPOSURE function

CONSTANT  $t_{len} = 0.001$  ! Length of exposure, oral, iv, im, or sc (h/day)

CONSTANT  $t_{interval} = 12$  ! administration interval, varied dependent on the exposure paradigm (h)

CONSTANT  $D_{start} = 0.0$  ! Initiation day of exposure (day)

CONSTANT  $D_{stop} = 5$  ! Termination day of exposure (day)

CONSTANT  $MAXT = 1.0$  ! maximum comm. interval

CONSTANT  $CINTC = 0.1$  ! Communication interval

$CINT = CINTC$  ! Communication interval

$T_{sim} = T_{stop} * 24$  !  $T_{stop}$  in hours

$DS = D_{start} * 24$  ! Initiation time point of exposure (h)

$D_{off} = (D_{stop} - D_{start}) * 24$  ! Exposure duration (h)

$TimeOn = D_{start} * 24$  ! Initiation time point of exposure (h)

TimeOff=Dstop\*24+tlen ! Termination time point of exposure (h)

Exposure=PULSE(0,tinterval,tlen)\*PULSE(DS,Tsim,Doff) ! Exposure paradigm

RDOSEoral=(DOSEoral/tlen)\*Exposure ! Administration rate

RAST=RDOSEoral-Kst\*AST ! Rate in the stomach

AST=Integ(RAST,0)/0.0 or Doseoral if the initial dose is twice as the subsequent dose.

RAI=Kst\*AST-Ka\*AI-Kfeces\*AI ! Rate in the intestine

Rfeces=Kfeces\*AI ! Fecal elimination rate

Afeces=Integ(Rfeces,0.0) ! Amount eliminated through feces

AI=Integ(RAI,0.0) ! Amount in the intestine

CAI=AI/VS<sub>i</sub> ! Concentration of the enrofloxacin in small intestine,  $\mu\text{mol/L}$

CAImg=AI\*MW<sub>mg</sub> ! Concentration of the total enrofloxacin in small intestine, unit conversion from  $\mu\text{mol/L}$  to  $\text{mg/L}$  ( $\mu\text{g/g}$ )

RAO=Ka\*AI ! Oral absorption rate

AAO=Integ(RAO,0.0) ! Amount absorbed

! Single IV dosing to the venous

IVR=DOSE<sub>iv</sub>/time<sub>iv</sub>

RIV=IVR\*(1.0-step(time<sub>iv</sub>)) ! Intravenous injection rate

AIV=Integ(RIV,0.0) ! Amount injected

! Single IM exposure

Rim=Kim\*Aimsite ! Intramuscular absorption rate

Aim=Integ(Rim,0.0) ! Amount absorbed via IM route

Rimsite=-Kim\*Aimsite ! Rate of changes in the amount of the drug in the injection site

Aimsite=Integ(Rimsite,Dose<sub>im</sub>) ! Amount of the drug remained in the injection site

! Multiple IM exposure (if needed)

!RDOSE<sub>im</sub>=(DOSE<sub>im</sub>/tlen)\*Exposure

!Rimsite=RDOSE<sub>im</sub>-Kim\*Aimsite

!Aimsite=Integ(Rimsite,0.0)

!Rim=Kim\*Aimsite

!Aim=Integ(Rim,0.0)

! Single SC exposure

$R_{sc} = K_{sc} * A_{sc}$  ! Subcutaneous absorption rate

$A_{sc} = \text{Integ}(R_{sc}, 0.0)$  ! Amount absorbed via SC route

$R_{scsite} = -K_{sc} * A_{sc}$  ! Rate of changes in the amount of the drug in the injection site

$A_{scsite} = \text{Integ}(R_{scsite}, D_{ose_{sc}})$  ! Amount of the drug remained in the injection site

! Metabolic rate

$K_m = K_{mC} * BW$  ! h<sup>-1</sup>

! Urinary elimination rates

$K_{urine} = K_{urineC} * BW$  ! L/h, for the enrofloxacin

$K_{urine1} = K_{urine1C} * BW$  ! L/h, for the ciprofloxacin

! Venous blood/plasma

$RV = Q_L * C_{VL} + Q_K * C_{VK} + Q_M * C_{VM} + Q_F * C_{VF} + Q_{rest} * C_{Vrest} + R_{iv} + R_{im} + R_{sc} - Q_C * C_V$  ! Rate,  $\mu\text{mol/h}$

$AV = \text{Integ}(RV, 0.0)$  ! Amount,  $\mu\text{mol}$

$CV = AV / V_{ven}$  ! Concentration of the total enrofloxacin (free plus bound),  $\mu\text{mol/L}$

$CV_{free} = CV * (1 - PB)$  ! Concentration of the enrofloxacin that is free,  $\mu\text{mol/L}$

$CV_{bound} = CV * PB$  ! Concentration of the enrofloxacin that is bound,  $\mu\text{mol/L}$

$CV_{mg} = CV * MW_{mg}$  ! Concentration of the total enrofloxacin (free plus bound), unit conversion from  $\mu\text{mol/L}$  to  $\text{mg/L}$  ( $\mu\text{g/g}$ )

! Arterial blood/plasma

$RA = Q_C * C_{VLu} - Q_C * C_{Afree}$  ! Rate,  $\mu\text{mol/h}$

$AA = \text{Integ}(RA, 0.0)$  ! Amount,  $\mu\text{mol}$

$CA = AA / V_{art}$  ! Concentration of the total enrofloxacin (free plus bound),  $\mu\text{mol/L}$

$CA_{free} = CA * (1 - PB)$  ! Concentration of the enrofloxacin that is free,  $\mu\text{mol/L}$

$CA_{bound} = CA * PB$  ! Concentration of the enrofloxacin that is bound,  $\mu\text{mol/L}$

$ABlood = AV + AA$  ! Amount of the total drug in the blood,  $\mu\text{mol}$

! Lung compartment

$RA_{Lu} = Q_C * (C_V - C_{VLu})$  ! Rate,  $\mu\text{mol/h}$



ALu=Integ(RALu,0.0) ! Amount,  $\mu\text{mol}$

CLu=ALu/VLu ! Concentration of the total enrofloxacin in the lung,  $\mu\text{mol/L}$

CVLu=CLu/PLu ! Concentration of the total enrofloxacin in venous blood drained from the lung,  $\mu\text{mol/L}$

! Liver compartment

RL=QL\*(CAfree-CVL)+RAO-Rmet ! Rate,  $\mu\text{mol/h}$

AL=Integ(RL,0.0) ! Amount,  $\mu\text{mol}$

CL=AL/VL ! Concentration of the total enrofloxacin in the liver,  $\mu\text{mol/L}$

CVL=CL/PL ! Concentration of the total enrofloxacin in the venous blood drained from the liver,  $\mu\text{mol/L}$

CLmg=CL\*MWmg ! Concentration of the total enrofloxacin in the liver,  $\text{mg/L}$  ( $\mu\text{g/g}$ )

! Metabolism of the parent compound in the liver compartment

Rmet=Km\*CL\*VL ! Total hepatic metabolic rate,  $\mu\text{mol/h}$

Rmet1=Rmet\*Frac ! Hepatic metabolic rate to the ciprofloxacin,  $\mu\text{mol/h}$

Rmet2=Rmet\*(1-Frac) ! Hepatic metabolic rate to other minor metabolites,  $\mu\text{mol/h}$

Amet=Integ(Rmet,0.0) ! Amount of the enrofloxacin that is metabolized in the liver,  $\mu\text{mol}$

Amet1=Integ(Rmet1,0.0) ! Amount of the ciprofloxacin that is produced in the liver,  $\mu\text{mol}$

Amet2=Integ(Rmet2,0.0) ! Amount of other minor metabolites that are produced in the liver,  $\mu\text{mol}$

! Kidney compartment

RK=QK\*(CAfree-CVK)-Rurine ! Rate,  $\mu\text{mol/h}$

AK=Integ(RK,0.0) ! Amount,  $\mu\text{mol}$

CK=AK/VK ! Concentration of the total enrofloxacin in the kidney,  $\mu\text{mol/L}$

CVK=CK/PK ! Concentration of the total enrofloxacin in the venous blood drained from the kidney,  $\mu\text{mol/L}$

Ckmg=Ck\*MWmg ! Concentration of the total enrofloxacin in the kidney,  $\text{mg/L}$  ( $\mu\text{g/g}$ )

! Urinary excretion of the parent compound

Rurine=Kurine\*CVK ! Rate,  $\mu\text{mol/h}$

Aurine=Integ(Rurine,0.0) ! Amount,  $\mu\text{mol}$

! Muscle compartment

RM=QM\*(CAfree-CVM) ! Rate,  $\mu\text{mol/h}$

AM=Integ(RM,0.0) ! Amount,  $\mu\text{mol}$

CM=AM/VM ! Concentration of the total enrofloxacin in the muscle,  $\mu\text{mol/L}$

CVM=CM/PM ! Concentration of the total enrofloxacin in the venous blood drained from the muscle,  $\mu\text{mol/L}$

CMmg=CM\*MWmg ! Concentration of the total enrofloxacin in the muscle,  $\text{mg/L}$  ( $\mu\text{g/g}$ )

! Fat compartment

RF=QF\*(CAfree-CVF) ! Rate,  $\mu\text{mol/h}$

AF=Integ(RF,0.0) ! Amount,  $\mu\text{mol}$

CF=AF/VF ! Concentration of the total enrofloxacin in the fat,  $\mu\text{mol/L}$

CVF=CF/PF ! Concentration of the total enrofloxacin in the venous blood drained from the fat,  $\mu\text{mol/L}$

CFmg=CF\*MWmg ! Concentration of the total enrofloxacin in the fat,  $\text{mg/L}$  ( $\mu\text{g/g}$ )

! Rest-of-body compartment

Rrest=Qrest\*(CAfree-CVrest) ! Rate,  $\mu\text{mol/h}$

Arest=Integ(Rrest,0.0) ! Amount,  $\mu\text{mol}$

Crest=Arest/Vrest ! Concentration of the total enrofloxacin in the rest-of-body,  $\mu\text{mol/L}$

CVrest=Crest/Prest ! Concentration of the total enrofloxacin in the venous blood drained from the rest-of-body,  $\mu\text{mol/L}$

! Mass balance for the enrofloxacin

Qbal=QC-QL-QK-QM-QF-Qrest ! Blood flow balance

Tmass=ABlood+AL+AK+AM+AF+Arest+ALu+Aurine+Amet ! Total amount in the body,  $\mu\text{mol}$

Bal=AAO+AIV+AIM+ASC-Tmass ! Mass balance, input minus output should be equal to zero at all time

END ! DERIVATIVE

! Add discrete events here as needed

! DISCRETE

! END

! code that is executed once at each communication interval goes here

CONSTANT TSTOP = 230

TERMT (T .GE. TSTOP, 'checked on communication interval: REACHED TSTOP')

END ! DYNAMIC

TERMINAL

! code that is executed once at the end of a simulation run goes here

END ! TERMINAL

END ! PROGRAM
